# Supplementary material
Source: publisher site journal article supplement (https://www.dovepress.com/article/311415)
Supplement: Supplementary file 1 [file get_supplementary_file.php]

**Table S1:** Comparison of dietary intake parameters in lean, overweight, and obese

| Dietary intake              | Lean Group<br>(10 M/10 F) | Overweight Group<br>(12 M/ 8 F) | Obese Group<br>(8 M/ 12 F) | p-value |
|-----------------------------|---------------------------|---------------------------------|----------------------------|---------|
| <b>Total Calories (cal)</b> | 2109.3 ± 722.4            | 2167 ± 538.2                    | 2104 ± 748.3               | 0.6913  |
| <b>Carbs (g)</b>            | 264.5 ± 95.8              | 265 ± 64.4                      | 215.5 ± 103.7              | 0.2736  |
| <b>Fat (g)</b>              | 66.9 ± 34.5               | 53 ± 27.33                      | 76.4 ± 35.2                | 0.4053  |
| <b>Protein (g)</b>          | 98 ± 42.3                 | 96 ± 52.4                       | 81.1 ± 27.3                | 0.6811  |
| <b>Cholesterol (mg)</b>     | 232.6 ± 172.1             | 227 ± 125.3                     | 212.2 ± 143.2              | 0.0872  |
| <b>Sodium (mg)</b>          | 1123 ± 487.6              | 1624 ± 509.2                    | 1351.558 ± 751.6           | 0.6942  |
| <b>Sugars (g)</b>           | 86.79 ± 59.7              | 88 ± 28.3                       | 107 ± 36.3                 | 0.7775  |
| <b>Fibre (g)</b>            | 14.5 ± 6                  | 14 ± 7.9                        | 9.9 ± 6.2                  | 0.2778  |

All data are expressed as mean ± SD

**Table S2:** Comparison of physical activity parameters in lean, overweight, and obese

| Physical activity                          | Lean Group<br>(10 M/10 F) | Overweight Group<br>(12 M / 8 F) | Obese Group<br>(8M /12F) | p-value |
|--------------------------------------------|---------------------------|----------------------------------|--------------------------|---------|
| <b>Time spent in sedentary (%)</b>         | 68.2 ± 8.2                | 69.9 ± 6.2                       | 70.6 ± 4.3               | 0.5167  |
| <b>Time spent in light activity (%)</b>    | 24.4 ± 6.2                | 24.3 ± 5.6                       | 22.6 ± 3.2               | 0.5026  |
| <b>Time spent in Moderate activity (%)</b> | 5.8 ± 2.9                 | 5.8 ± 2.1                        | 5.7 ± 1.9                | 0.9796  |
| <b>Time spent in hard activity (%)</b>     | 1.2 ± 0.9                 | 0.86 ± 0.7                       | 0.85 ± 0.6               | 0.3211  |
| <b>Average MET rate/day</b>                | 1.5 ± 0.17                | 1.57 ± 0.1                       | 1.54 ± 0.09              | 0.4660  |
| <b>Average step count/day</b>              | 10707 ± 3446.2            | 16367.9 ± 30063.4                | 8464.4 ± 2999.2          | 0.3665  |
| <b>Total working hours /per week</b>       | 30.5 ± 7.4                | 35.3 ± 8.8                       | 33.0 ± 5.3               | 0.1438  |

All data are expressed as mean ± SD

**Table S3:** Comparison of metabolic risk factors in lean, overweight, and obese

| Fasting concentration of serum samples | Lean Group<br>(10 M/10 F) | Overweight Group<br>(12 M/8 F) | Obese Group<br>(8 M / 12 F) | p-value |
|----------------------------------------|---------------------------|--------------------------------|-----------------------------|---------|
| BP/ systolic (mmHg)                    | 105 ± 9.2                 | 106 ± 11.6                     | 116.5 ± 9.5                 | 0.0039  |
| BP/diastolic (mmHg)                    | 62.8 ± 9.6                | 68 ± 9                         | 70.36 ± 10.1                | 0.0291  |
| HR                                     | 66.5 ± 11.9               | 73 ± 10                        | 75.7 ± 8.6                  | 0.0252  |
| Fasting glucose (mmol/l)               | 4.8 ± 1.3                 | 5.08 ± 0.53                    | 5.26 ± 0.94                 | 0.0912  |
| Triglycerides (mmol/l)                 | 0.76 ± 0.29               | 1.00 ± 0.33                    | 1.04 ± 0.15                 | 0.0049  |
| Total cholesterol (mmol/l)             | 4.4 ± 0.90                | 5.05 ± 0.55                    | 5.16 ± 0.54                 | 0.0043  |
| HDL cholesterol (mmol/l)               | 1.5 ± 0.28                | 1.23 ± 0.21                    | 1.16 ± 0.18                 | <0.0001 |
| Insulin Con. (mu/l)                    | 3.83 ± 0.88               | 5.03 ± 1.5                     | 4.5 ± 0.74                  | 0.0068  |
| HOMA-IR                                | 0.82 ± 0.22               | 1.13 ± 0.32                    | 1.05 ± 0.15                 | 0.0009  |
| C-peptide                              | 1.26 ± 0.22               | 1.31 ± 0.28                    | 1.57 ± 0.38                 | 0.0107  |
| CRP (mg/dL)                            | 0.16 ± 0.06               | 0.50 ± 0.28                    | 0.53 ± 0.30                 | <0.0001 |
| TNF-α (pg/ml)                          | 16.5 ± 6.3                | 18.7 ± 9.6                     | 28 ± 23.4                   | 0.0542  |

All data are expressed as mean ± SD . P<0.05 was considered statistically significant , P<0.01 was considered highly significant , and P< 0.001/P< 0.0001 were considered extremely significant.

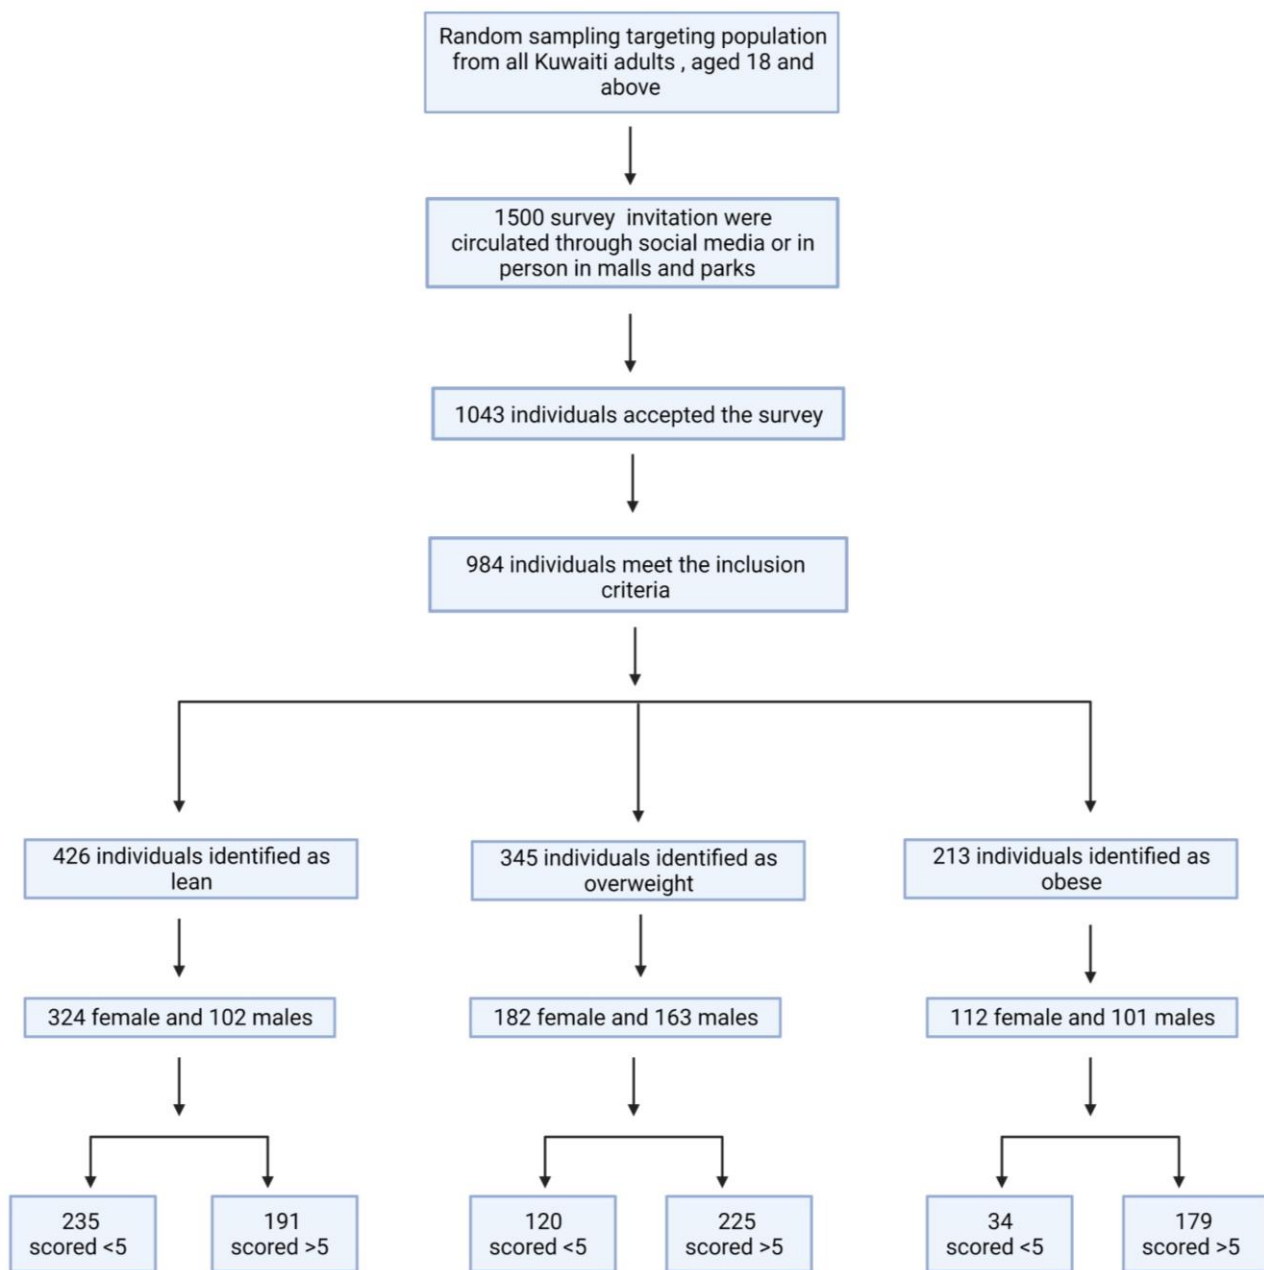

**Supplementary Figure S1.** Survey study participant flow diagram

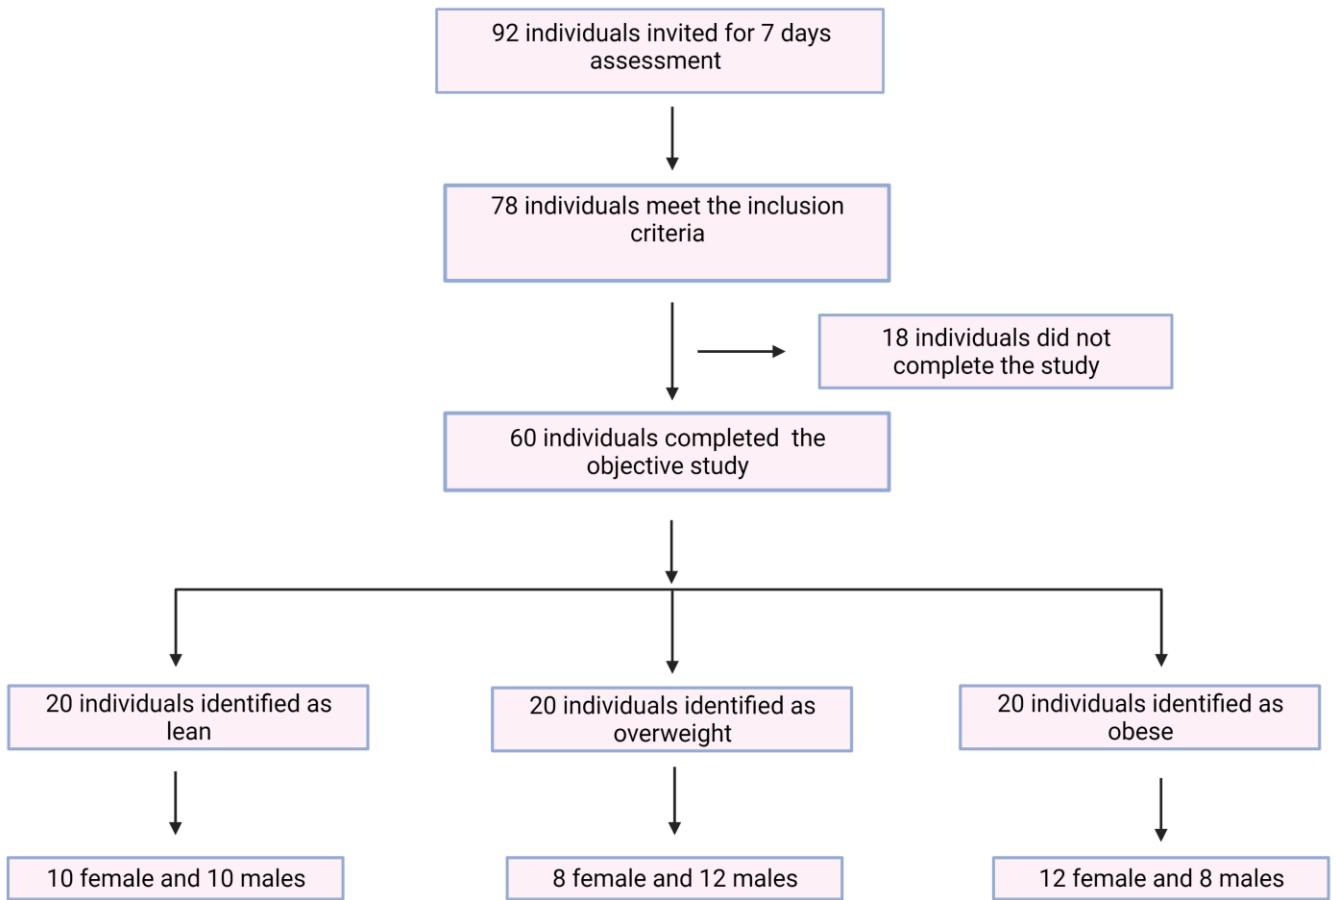

**Supplementary Figure S2.** Objective study participant flow diagram.
